# Supplementary material
Source: publisher figshare collection journal article supplement (https://gsapubs.figshare.com/ndownloader/files/23293973)
Supplement: Supplementary file 1 [file 23293973]

Granite types related to magma-crust interaction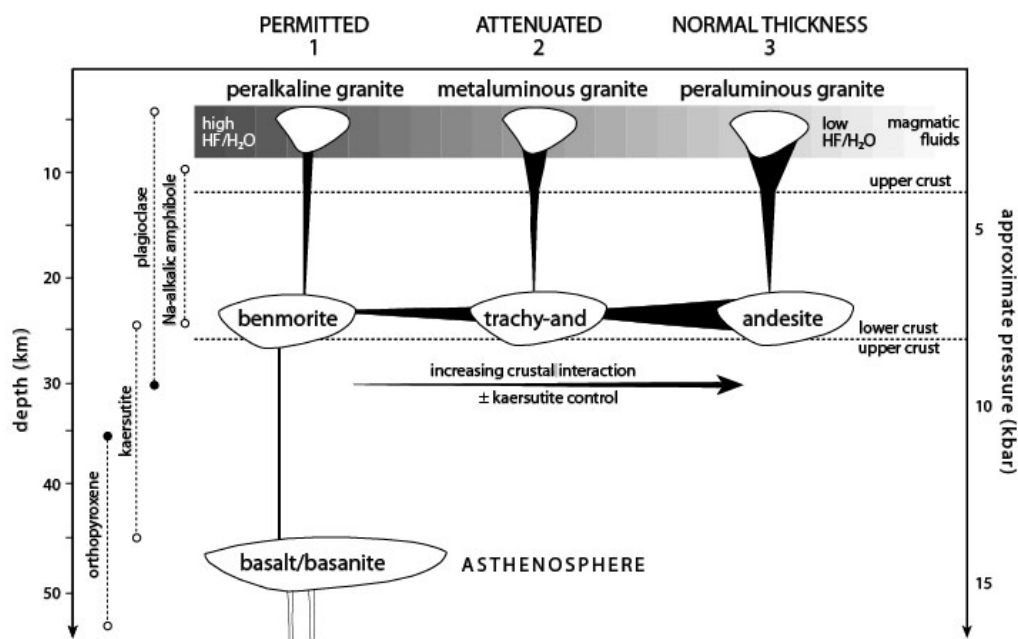

Figure DR1. Possible fractionation pathways for anorogenic granite derived from an initial alkali basalt magma. Peralkaline refers to granites with molar  $(\text{Na} + \text{K})/\text{Al} > 1$ ; metaluminous to  $\text{Al}/(\text{Na} + \text{K} + \text{Ca}) \approx 1$ ; peraluminous to  $\text{Al}/(\text{Na} + \text{K} + \text{Ca}) > 1$ . Permitted refers to the situation when a granite can traverse the crust without significant interaction with the crust (*sensu* Pitcher, 1979). 'Attenuated' refers to granite emplaced into attenuated lithosphere (e.g. Skaergaard, Mull); normal thickness to granite that must traverse lithosphere that is not attenuated and is thus likely to undergo significant interaction with crustal rocks (including S-type *sensu* Chappel & White, 1974, 2001). The fractionating phases on the left of the diagram are those largely responsible for the generation of peralkaline derivatives (LeMasurier et al., 2004). Fractionation of kaersutite is known to result in Si-saturation in the anorogenic volcanic rocks and associated intrusions of Marie Byrd Land, Antarctica (LeMasurier et al., 2004). The first derivative of the alkali basalt is likely to be of the alkali hawaiite-mugearite-benmorite series, and here it is assumed that benmorite will pond at the base of the lower crust. Interaction of a Si-undersaturated benmorite with lower crust will result in more Si-saturated derivatives, as will kaersutite fractionation. Increasing interaction with the upper crust from left to right in the diagram will result in

progressively more aluminous magma (shown by black triangles). At the crystallization depth of the granite, magmatic fluids associated with the peralkaline granite will have a high HF/H<sub>2</sub>O ratio often resulting in the crystallization of primary fluorite. With increasing input of crustal material the fluids will have progressively lower HF/H<sub>2</sub>O ratios.

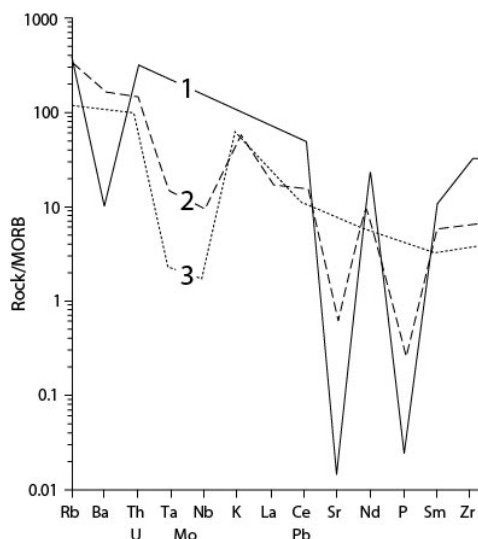

Figure DR2. Average element abundances for 1) peralkaline melts (LeMasurier et al., 2004), 2) metaluminous granite in attenuated lithosphere (e.g. Palaeocene of Mull; Pearce et al., 1984) 3) peraluminous granite (Chile; Pearce et al., 1984). Isotopic data confirms that the crustal input into these magmas increases in the order 1, 2 and 3, i.e. the abundances of elements, including many metals, is substantially higher in peralkaline melts, without crustal input. The position of Mo, Pb and U is taken from Sun and McDonough (1989), such that they have similar compatibility to Th, Ta and Pb respectively. The behaviour of the transition elements such as Zn and Cu during fractional crystallization is poorly understood, and they are more likely to be modified during fluid circulation at high levels. Normalizing values from Sun and McDonough (1989).

Chappell, B.W., and White, A.J.R., 1974, Two contrasting granitic types. *Pacific Geology*, 8, 173-174.

Chappell, B.W., and White, A.J.R., 2001, Two contrasting granitic types: 25 years later. *Australian Journal of Earth Sciences*, 48, 4, 489-500.

LeMasurier, W.E., Futa, K., Hole, M., and Kawachi, Y., 2003, Polybaric evolution of phonolite, trachyte, and rhyolite volcanoes in Eastern Marie Byrd Land, Antarctica: Controls on peralkalinity and silica saturation. *International Geology Review*, 45, 12, 1055-1099.

Pearce, J.A., Harris, N.B.W., and Tindle, A.G., 1984, Trace element discrimination diagrams for the tectonic interpretation of granitic rocks. *Journal of Petrology*, 25, 4, 956-983.

Pitcher, W.S., 1979, The nature, ascent and emplacement of granitic magmas. *Journal of the Geological Society*, 136, 627-662.

Sun, S.S., and McDonough, W. F., 1989, Chemical and isotopic systematic of oceanic basalts: implications for mantle compositions and processes. In: A. D. Saunders and M.J. Norry (eds): *Magmatism in the Ocean Basins*. Geological Society of London Special Publication, 42, 313-346.

### **Source literature for ages of Rapakivi and other large anorogenic granites:**

Betts, P.G., Giles, D., Schaefer, B.F., and Mark, G., 2007, 1600-1500 Ma hotspot track in eastern Australia: implications for Mesoproterozoic continental reconstructions. *Terra Nova*, 19, 496-501.

Bonin, B., 2007, A-type granites and related rocks: Evolution of a concept, problems and prospects. *Lithos*, 97, 1-29.

Larin, A.M., 2009, Rapakivi granites in the geological history of the Earth. Part 1, Magmatic associations with Rapakivi granites: Age, geochemistry, and tectonic setting. *Stratigraphy and Geological Correlation*, 17, 235-258.

Sharkov, E.V., 2010, Middle-Proterozoic anorthosite-rapakivi granite complexes: An example of within-plate magmatism in abnormally thick crust: Evidence from the East European Craton. *Precambrian Research*, 183, 689-700.

Wyborn, L.A.I., Page, R.W., and McCulloch, M.T., 1988, Petrology, geochronology and isotope geochemistry of the post-1820 Ma granites of the Mount Isa inlier: Mechanisms for the generation of Proterozoic anorogenic granites. *Precambrian Research*, 40/41, 509-541.

### **Source literature for Mesoproterozoic copper sulphides**

#### Data sources

##### 1. Torridon Group

Age: 1.0 Ga (Stewart 2002)

Copper sulfides: chalcopyrite-pyrite intermixtures (authors' unpublished data)

$\delta^{34}\text{S}$  values: -35 to -39 per mil (authors' unpublished data)

Interpretation of microbial sulfate reduction: Parnell et al. 2010

Precompactional/early diagenetic origin: authors' unpublished data  
Lacustrine environment: Stewart 2002

2. Midcontinent Rift

Age: 1.1 Ga (Mauk et al. 1992)  
Copper sulfides: chalcocite (Burnie et al. 1972)  
 $\delta^{34}\text{S}$  values: -15.8 to +29.2 per mil (Burnie et al. 1972)  
Interpretation of microbial sulfate reduction: Burnie et al. 1972  
Precompactional/early diagenetic origin: Mauk et al. 1992  
Lacustrine or restricted marine environment: Elmore et al. 1989

3. Stoer Group

Age: 1.18 Ga (Parnell et al. 2010)  
Copper sulfides: chalcocite (Parnell et al. 2010)  
 $\delta^{34}\text{S}$  values: -35.5 to -18.4 per mil (Parnell et al. 2010)  
Interpretation of microbial sulfate reduction: Parnell et al. 2010  
Precompactional/early diagenetic origin: Parnell et al. (2010)  
Lacustrine environment: Stewart 2002

4. Lower Belt Supergroup

Age: 1.46 Ga (Sears et al. 1998)  
Copper sulfides: unspecified (Strauss and Schieber 1990)  
 $\delta^{34}\text{S}$  values: -17 to +12 per mil (Strauss and Schieber 1990)  
Interpretation of microbial sulfate reduction: Lange and Sherry 1983, Strauss and Schieber 1990  
Precompactional/early diagenetic origin: Lange and Sherry 1983, Hayes and Einaudi 1986  
Lacustrine or restricted marine environment: Winston 1990

Burnie, S.W., Schwarcz, H.P., and Crocket, J.H., 1972, A sulfur isotopic study of the White Pine mine, Michigan. *Economic Geology*, 67, 895-914 (1972).

Elmore, R.D., Milavec, G.J., Imbus, S.W., and Engel, M.H., 1989, The Precambrian Nonesuch Formation of the North American Mid-continent Rift, sedimentology and organic geochemical aspects of lacustrine deposition. *Precambrian Research*, 43, 191-213.

Hayes, T.S., and Einaudi, M.T., 1986, Genesis of the Spar Lake strata-bound copper-silver deposit, Montana: Part I. Controls inherited from sedimentation and preore diagenesis. *Economic Geology*, 81, 1899-1931.

Lang, I.M., and Sherry, R.A., 1983, Genesis of the sandstone (Revett) type of copper-silver occurrences in the Belt Supergroup of northwestern Montana and northeastern Idaho. *Geology*, 11, 643-646.

Mauk, J.L., Kelly, W.C. van der Pluijm, B.A., and Seasor, R.W., 1992, Relations between deformation and sediment-hosted copper mineralization: Evidence from the White Pine part of the Midcontinent rift system. *Geology*, 20, 427-430.

Strauss, H., and Schieber, J., 1990, A sulfur isotope study of pyrite genesis: The Mid-Proterozoic Newland Formation, Belt Supergroup, Montana. *Geochimica et Cosmochimica Acta*, 54, 197-204.

Parnell, J., Boyce, A.J., Mark, D., Bowden, S., and Spinks, S., 2010, Early oxygenation of the terrestrial environment during the Mesoproterozoic. *Nature*, 468, 290-293.

Sears, J.W., Chamberlain, K.R., and Buckley, S.N., 1998, Structural and U-Pb geochronological evidence for 1.47 Ga rifting in the Belt Basin, western Montana. *Canadian Journal of Earth Science*, 35, 467-475.

Stewart, A.D., 2002, The later Proterozoic Torridonian rocks of Scotland: Their Sedimentology, Geochemistry and Origin. Geological Society Memoir No. 24.

Winston, D., 1990, Evidence for intracratonic, fluvial and lacustrine settings of Middle and Late Proterozoic basins of western USA. *Geol. Assoc. Can. Spec. Paper*, 38, 535-564.

### **Source literature for ages of high grade metalliferous ore deposits**

High grade ores of zinc: Sawkins (1989)

Richest zinc ores: Taylor et al. (2009).

High grade ores of copper: Skirrow and Ashley (2000).

Supergiant copper deposit, Olympic Dam: Groves et al. (2010).

Molybdenite-bearing anorogenic granites: Dall'Agnol et al. (1999); Damman (1989); Kirs et al. (2004); Lehmann (1987). Molybdenite-bearing Mesoproterozoic pegmatite: von Knorring and Dearnley (1960).

Highest grade molybdenum deposit, Merlin: Jones et al. (2010).

Dall'Agnol, R., Costi, H.T., Leite, A.A. da S., de Magalhaes, M.S., and Texeira, N.P., 1999, Rapakivi granites from Brazil and adjacent areas. *Precambrian Research*, 95, 9-39.

Damman, A.H., 1989, The fluid evolution of a Proterozoic high-level anorogenic granite from the Gasborn area, West Bergslagen, central Sweden. *Lithos*, 22, 159-172.

- Groves, D.I., Bierlein, F.P., Meinert, L.D., and Hitzman, M.W., 2010, Iron oxide copper-gold (IOCG) deposits through Earth history: Implications for origin, lithospheric setting, and distinction from other epigenetic iron oxide deposits. *Economic Geology*, 105, 641-654.
- Jones, M., Cudahy, T., Parsons, A., and Laukamp, C., 2010, Hyperspectral mineral maps reveal unseen geology at Mount Dore, Cloncurry district, Queensland. 15<sup>th</sup> Australian Remote Sensing and Photogrammetry Conference abstracts.
- Kirs, J., Haapala, I., and Ramo, O.T., 2004, Anorogenic magmatic rocks in the Estonian crystalline basement. *Proceedings of the Estonian Academy of Sciences: Geology*, 53, 210-225.
- Lehmann, B., 1987, Molybdenum distribution in Precambrian rocks of the Colorado mineral belt. *Mineralium Deposita*, 22, 47-52.
- Sawkins, F.J., 1989, Anorogenic felsic magmatism, rift sedimentation and giant Proterozoic Pb-Zn deposits. *Geology*, 17, 657-660.
- Skirrow, R.G., and Ashley, P.M., 2000, Proterozoic Cu-Au systems of the Curnamona Province. *MESA Journal*, 19, 48-50.
- Taylor, R.D., Leach, D.L., Bradley, D.C., and Pisarevsky, S.A., 2009, Compilation of Mineral Resource Data for Mississippi Valley-Type and Clastic-Dominated Sediment-Hosted Lead-Zinc Deposits. USGS Open File Report 2009-1297.
- Von Knorring, O., and Dearnley, R., 1960, Molybdenite associated with Laxfordian gneisses at Loch Stack, Sutherlandshire. *Mineralogical Magazine*, 32, 344-345.
